# Supplementary material for: The polygenic implication of clopidogrel responsiveness: Insights from platelet reactivity analysis and next-generation sequencing
Source: PubMed Central journal article supplement (PMC11239111; doi:10.1371/journal.pone.0306445), 2024-07-11

**Figure S1.** Linkage disequilibrium analysis through Haploview 4.2.

**Chr4**

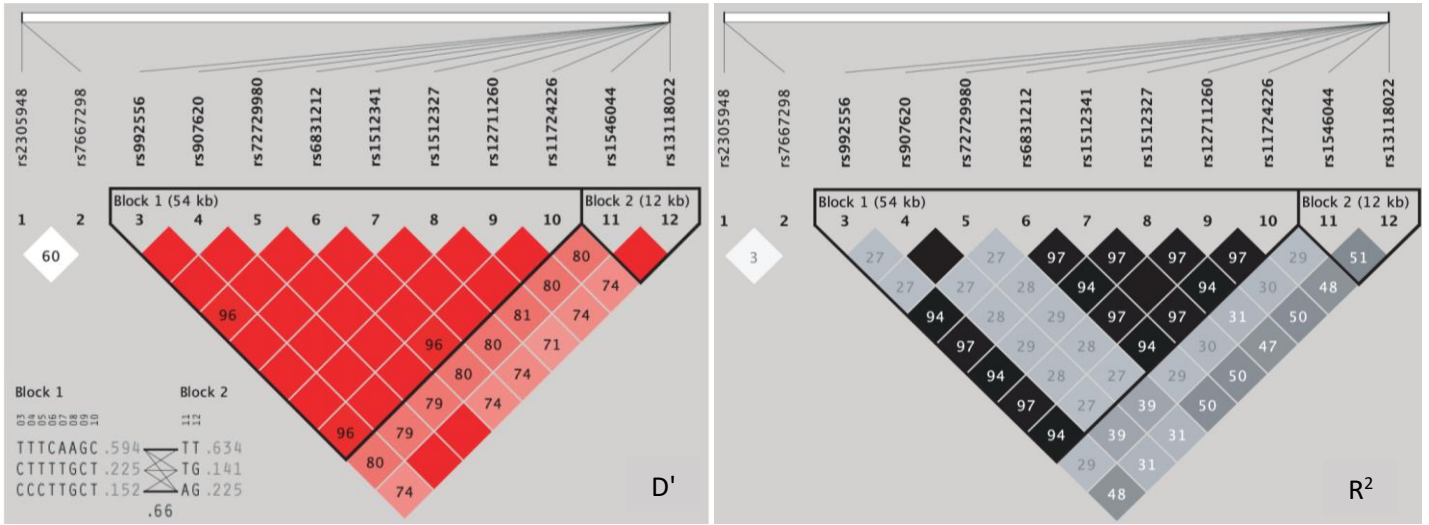

**Chr6**

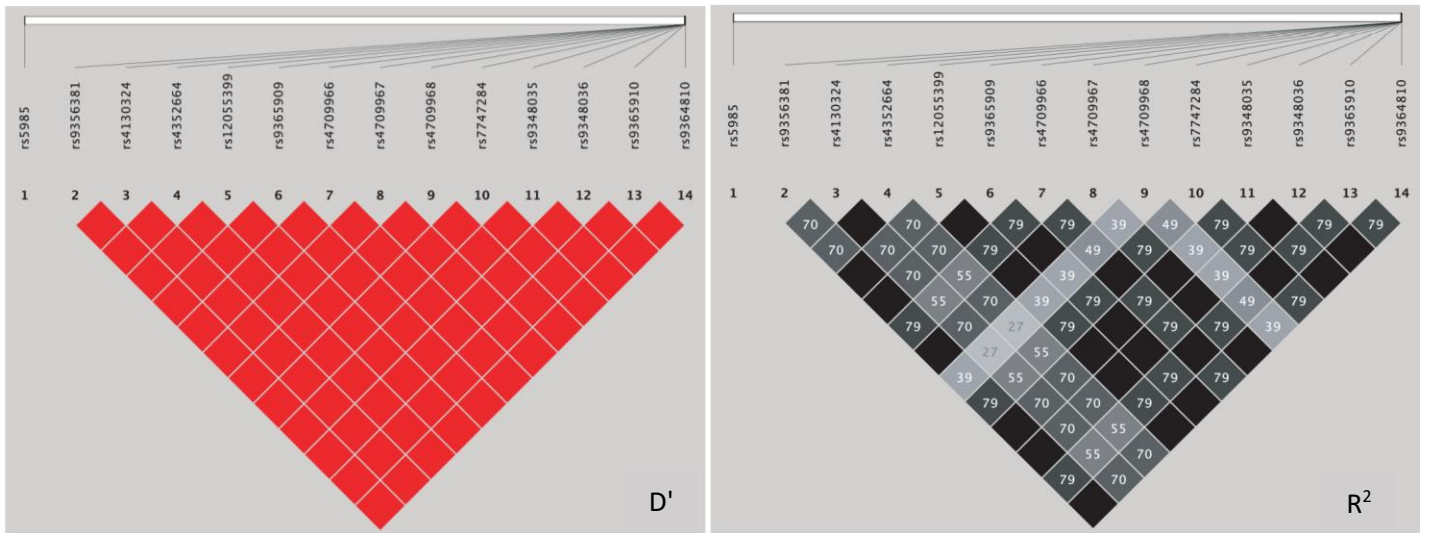

**Chr7**

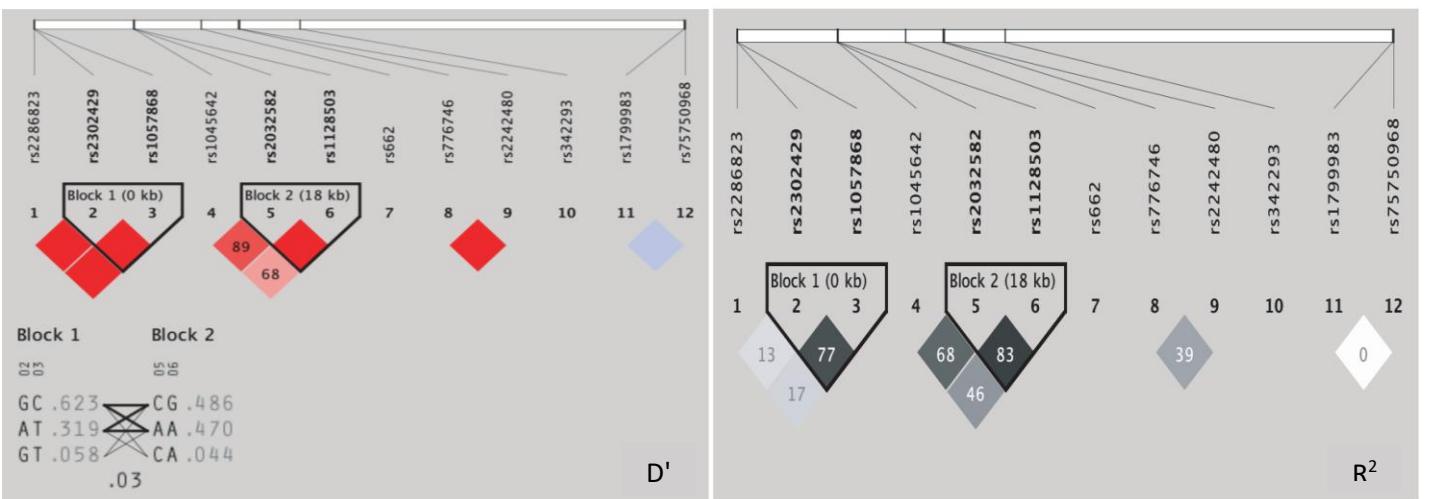

**Chr9**

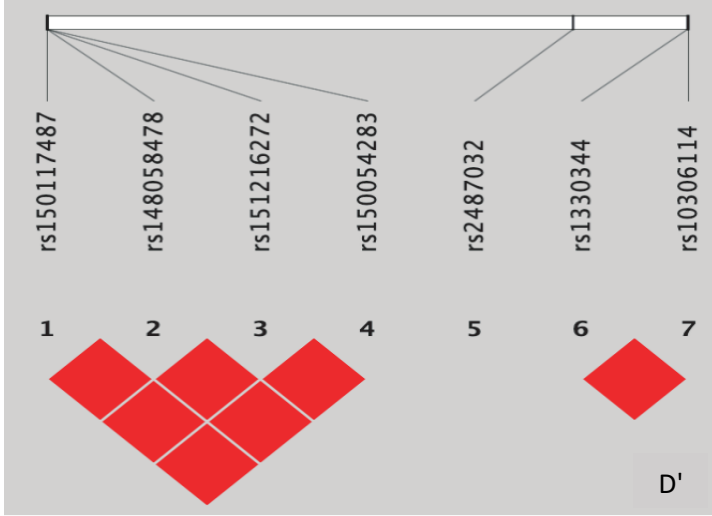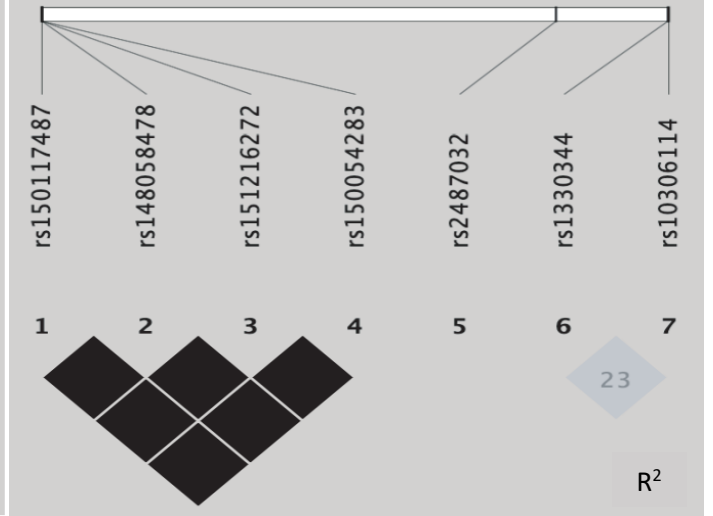

**Chr10**

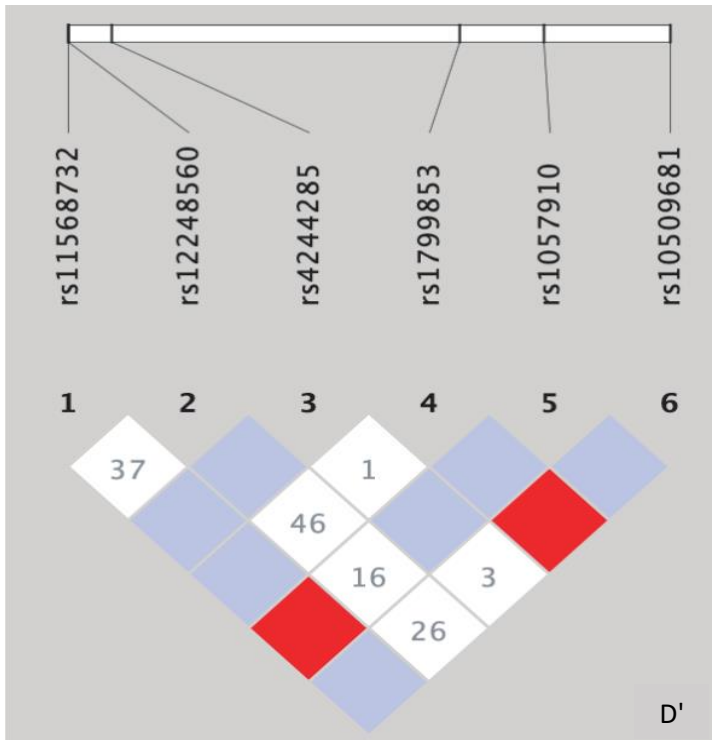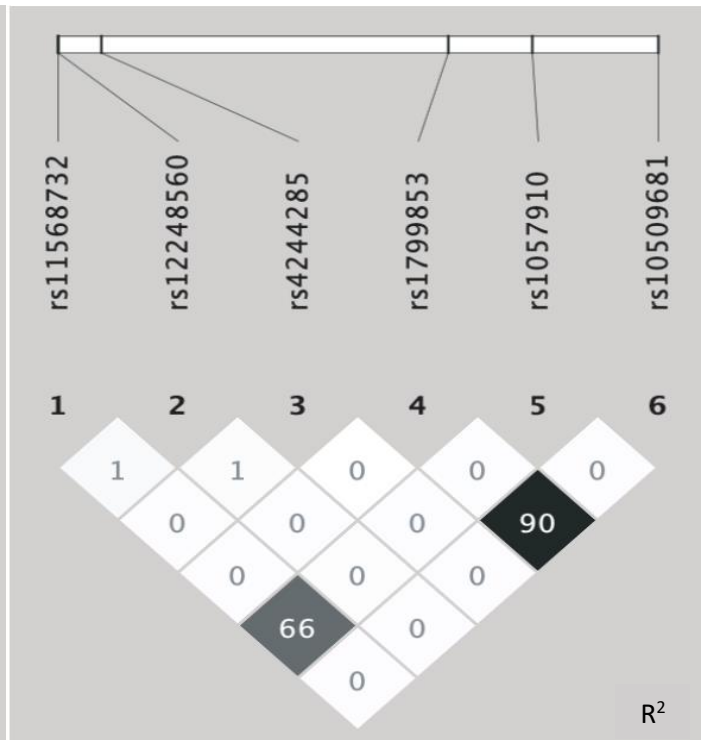

### Chr16

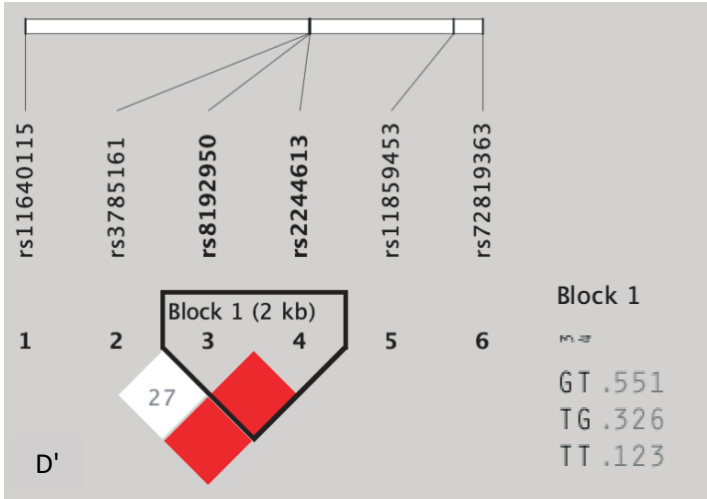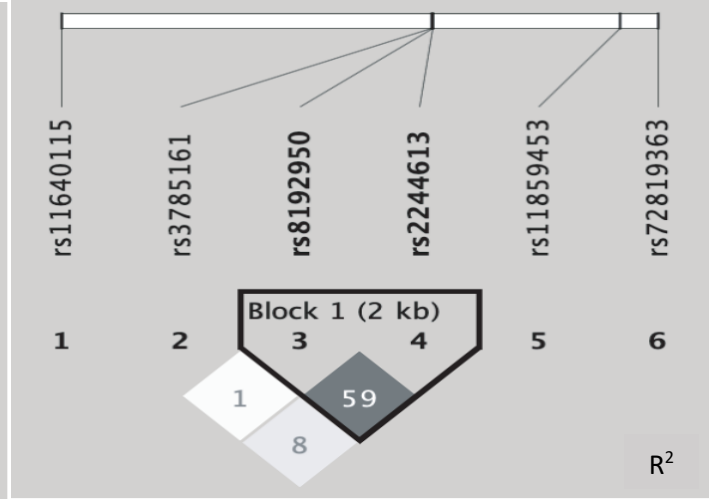

### Chr19

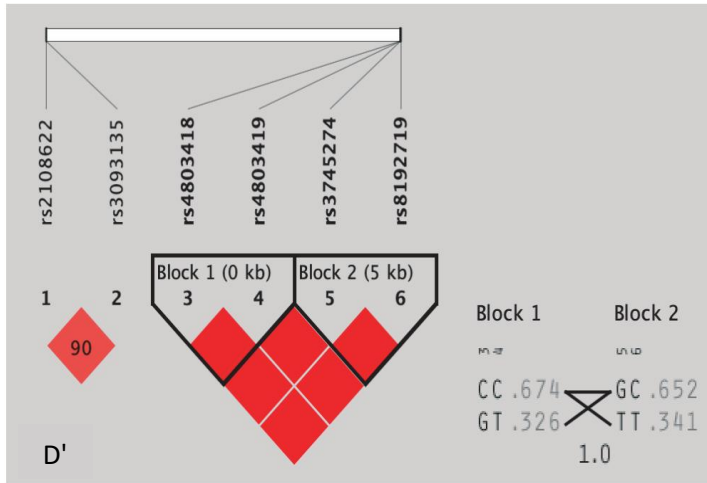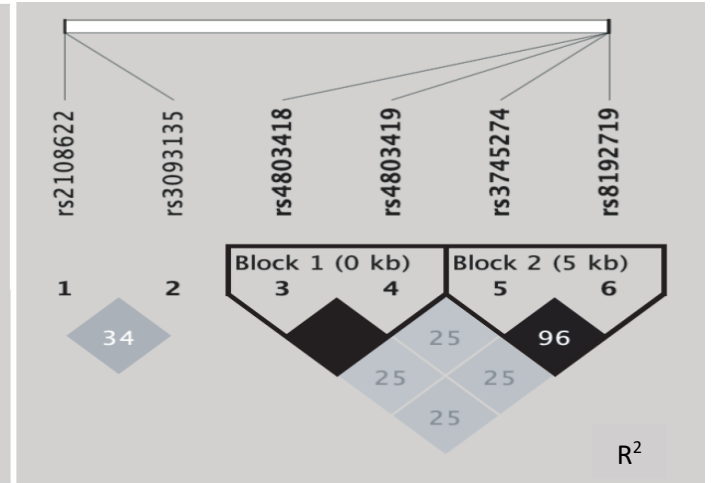

### Chr1

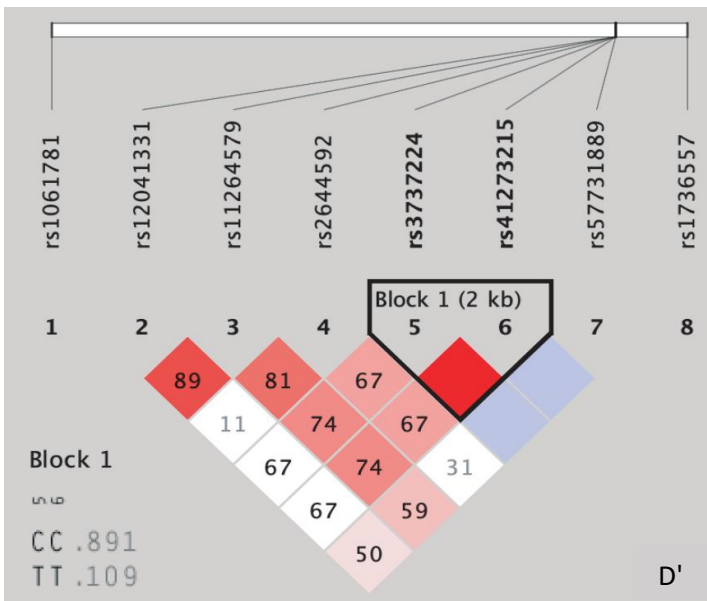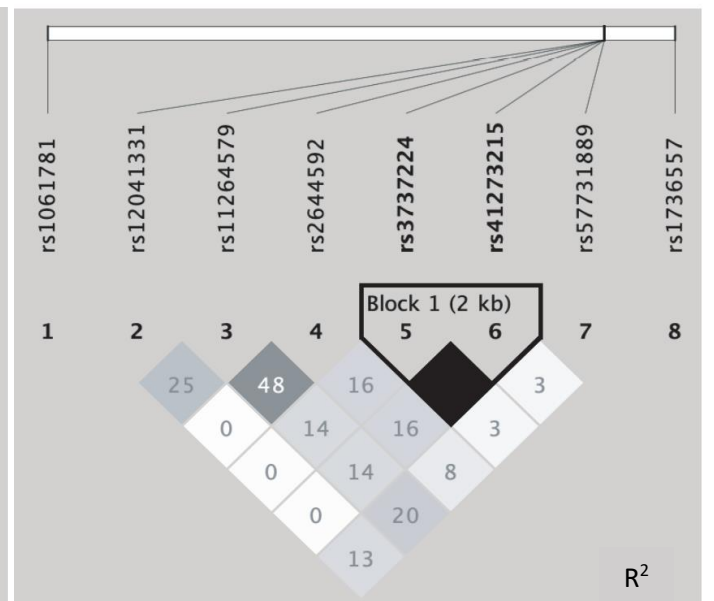

# Chr3

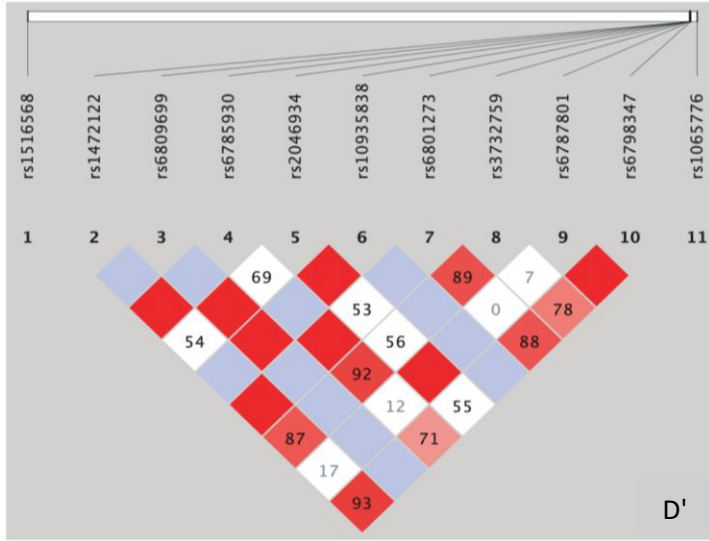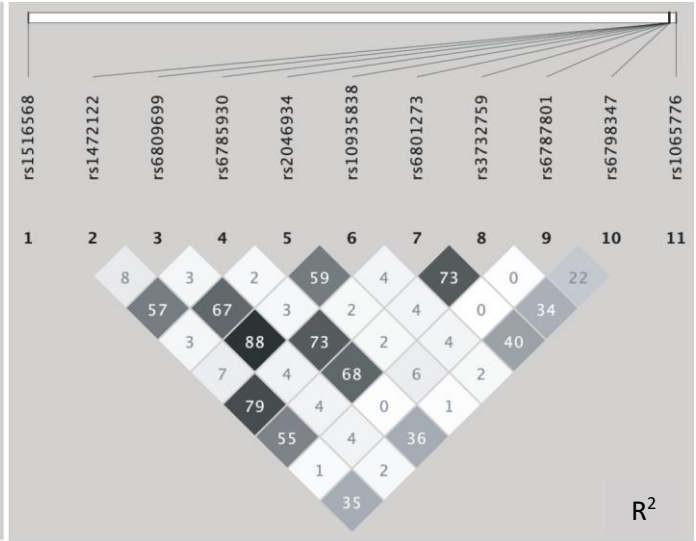

Supplement: pone.0306445.s001.pdf [file pone.0306445.s001.pdf]
