# Supplementary material for: The polygenic implication of clopidogrel responsiveness: Insights from platelet reactivity analysis and next-generation sequencing
Source: PubMed Central journal article supplement (PMC11239111; doi:10.1371/journal.pone.0306445), 2024-07-11

**Figure S2.** Boxplots - Mean CT values differences respect SNPs

**Haplotype 1 Chr 4 - *NR3C2***

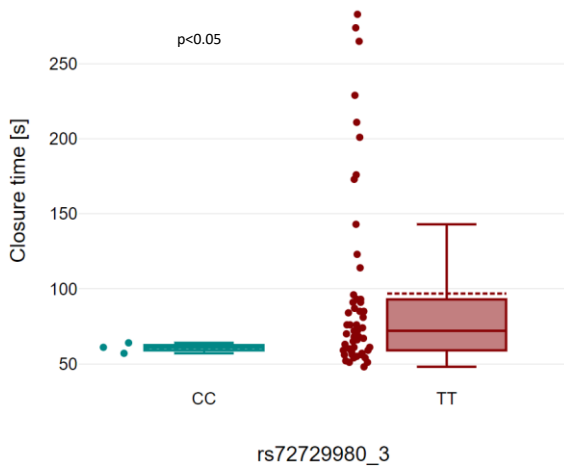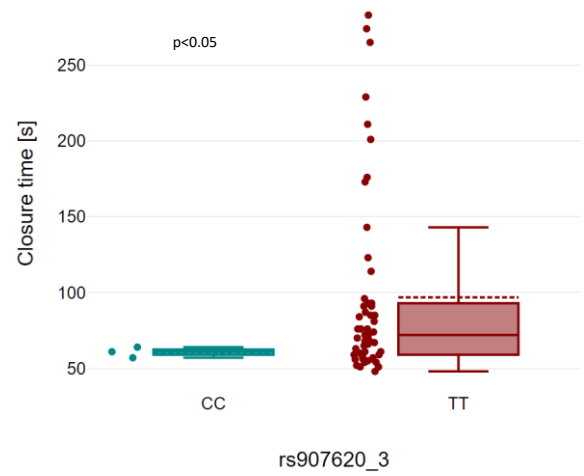

**Haplotype 2 Chr 6 - *PDE10A***

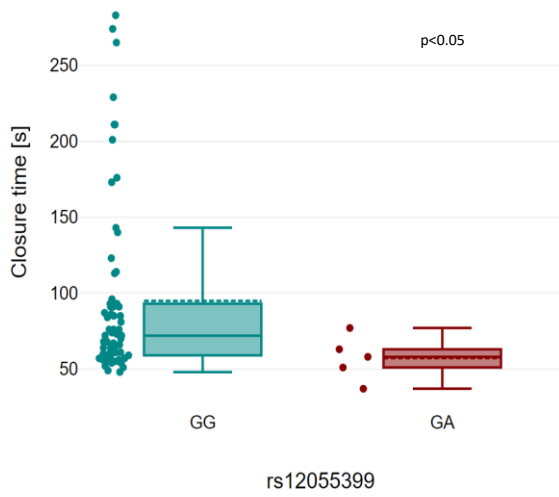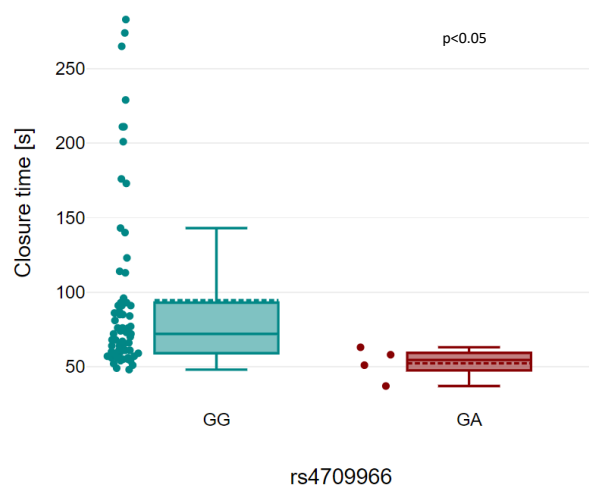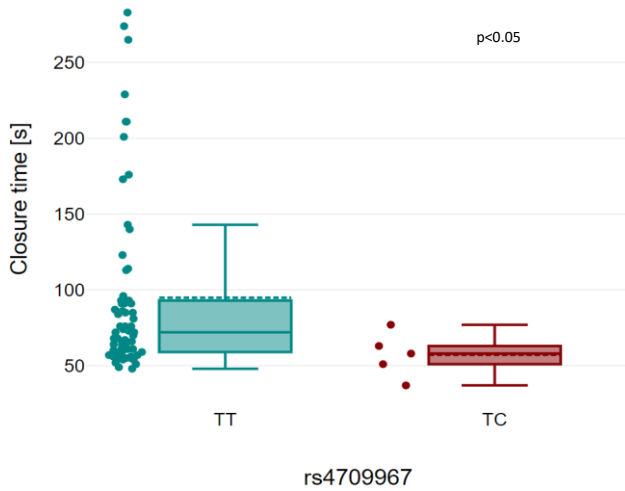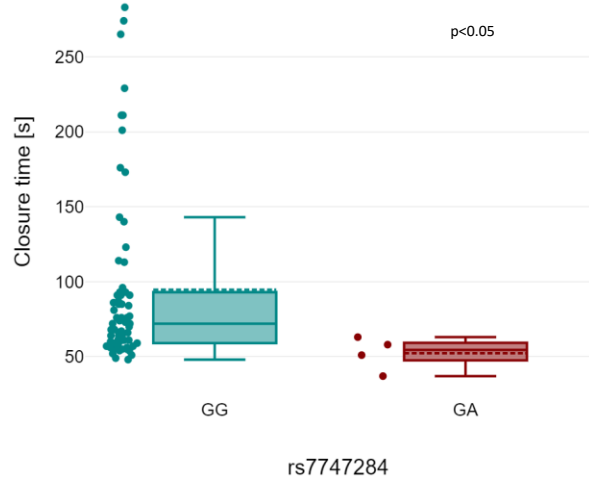

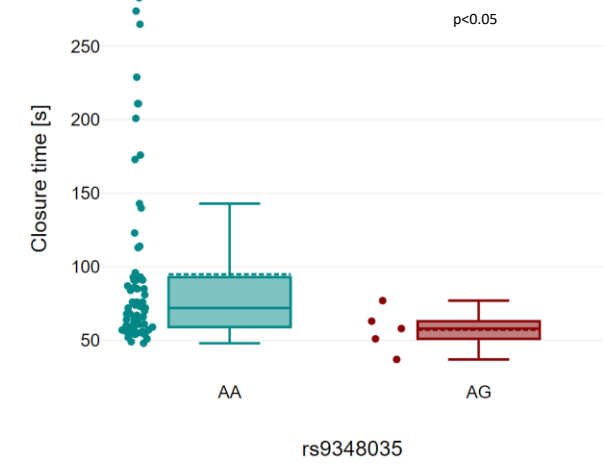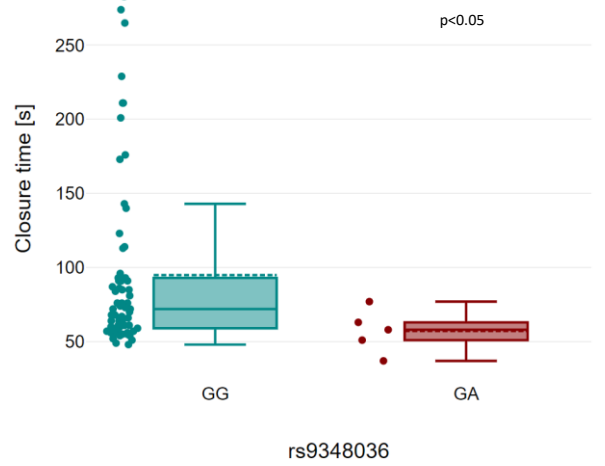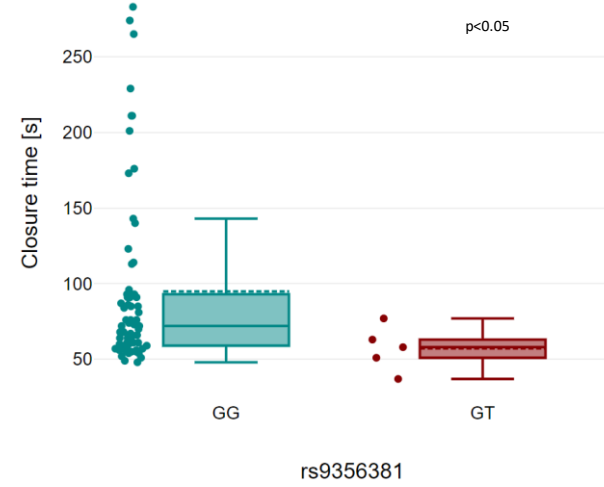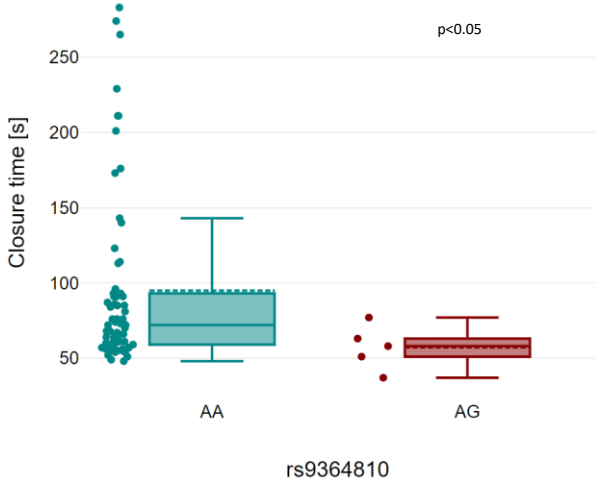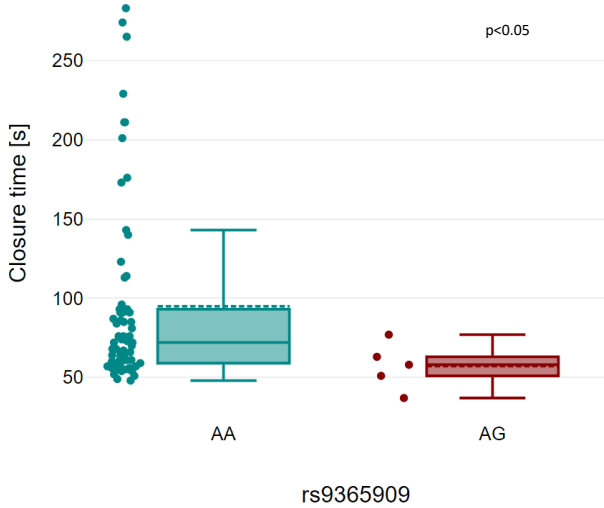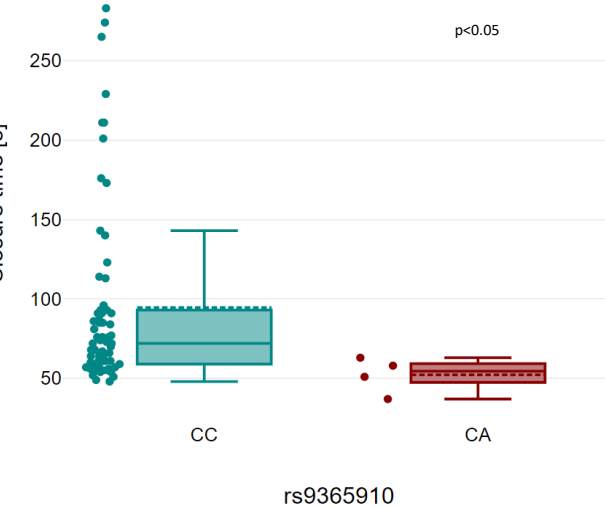

### Haplotype 3 Chr 7 – *POR*

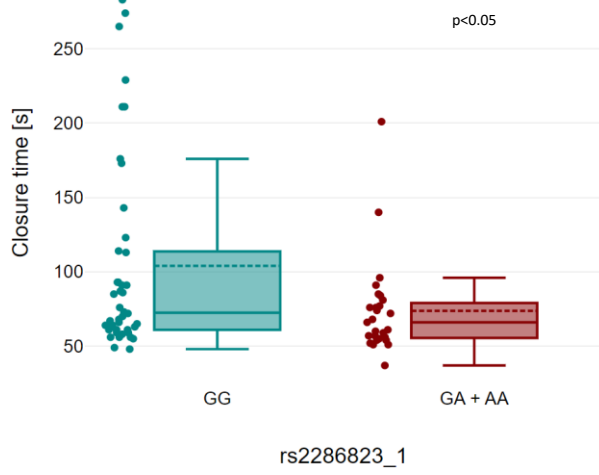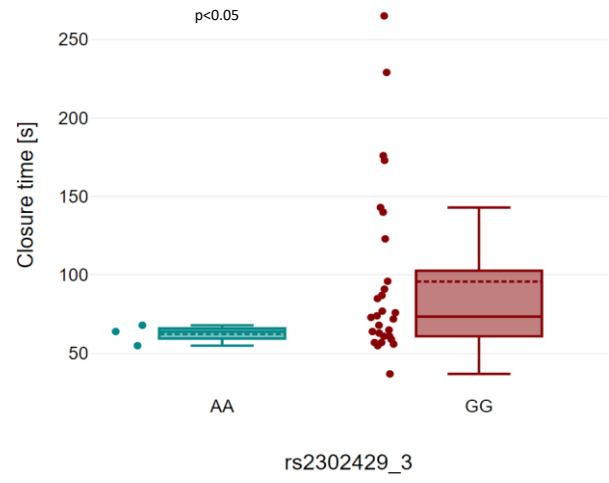

### Haplotype 4 Chr 7 - *ABCB1*

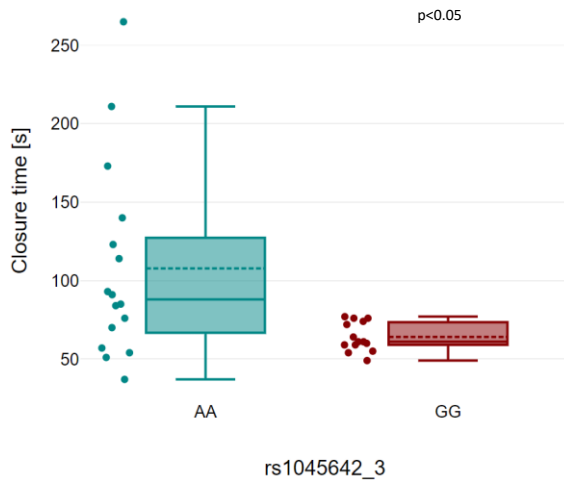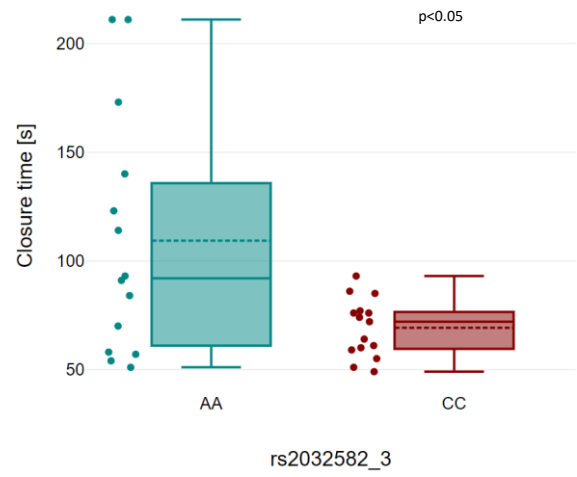

### *CYP3A5*

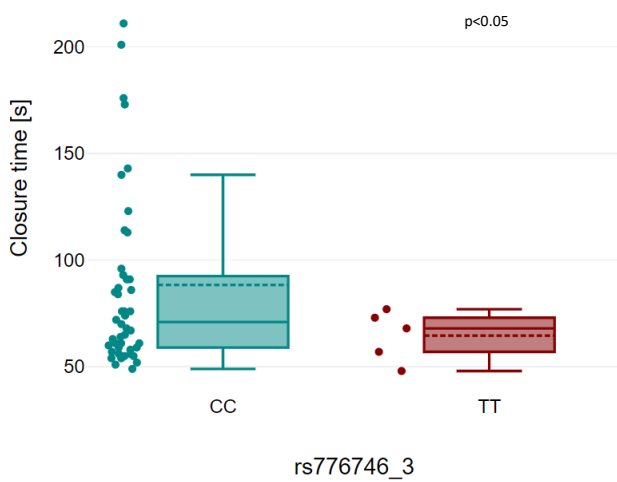

### *PTGS1*

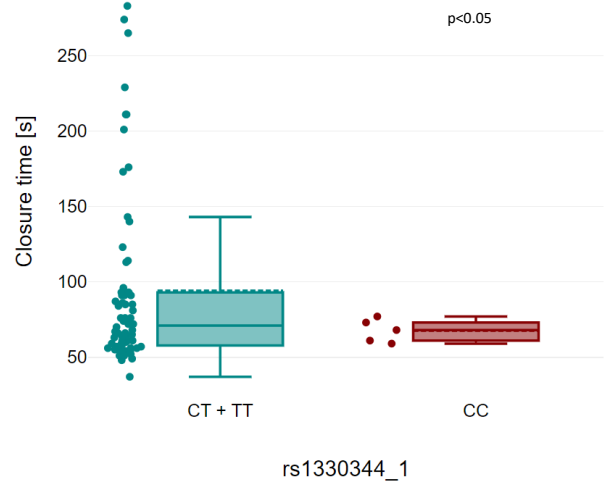

**CYP2C19**

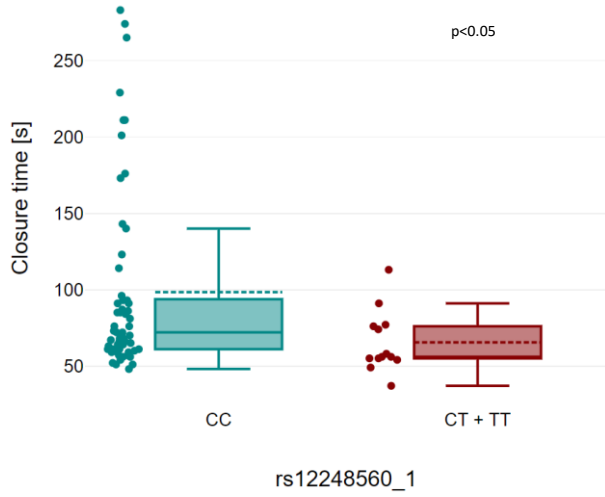

**CDH15**

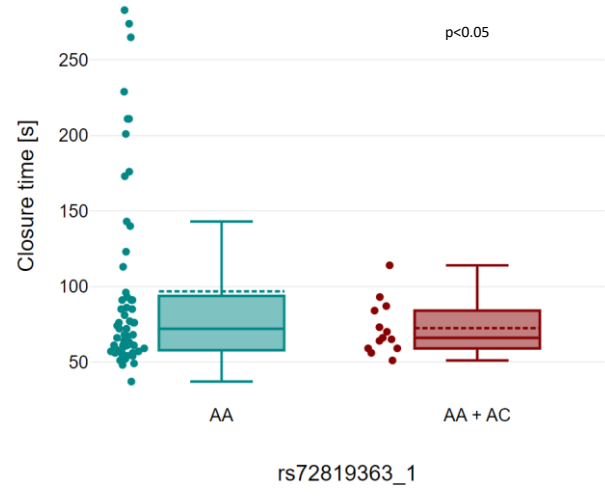

**CYP4F2**

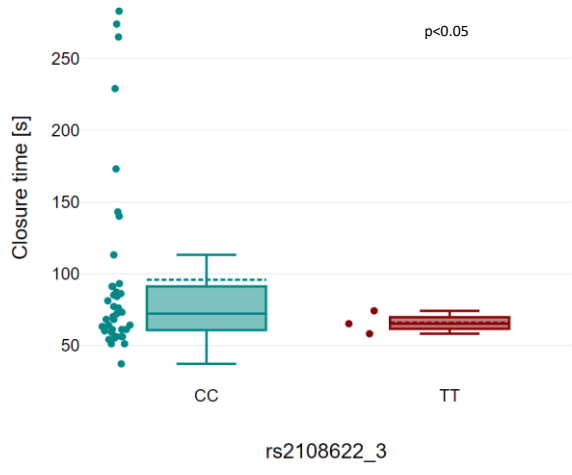

**N6AMT1**

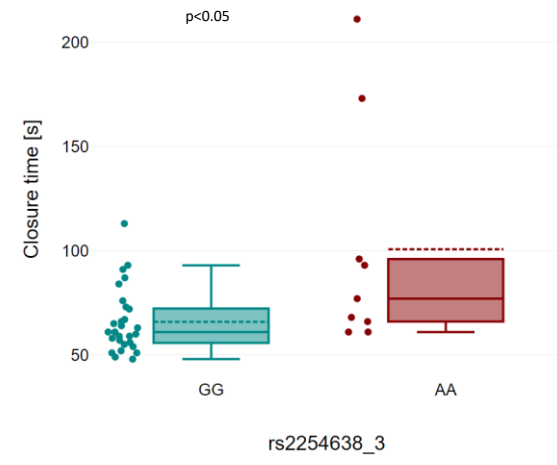

Supplement: pone.0306445.s002.pdf [file pone.0306445.s002.pdf]
